# Supplementary material for: A New Class of Small Molecule Inhibitor of BMP Signaling
Source: PubMed Central journal article supplement (PMC3639963; doi:10.1371/journal.pone.0062721), 2013-04-30
Supplement: pone.0062721.s002.pdf [file pone.0062721.s002.pdf]

Table S1. Differential scanning fluorimetry screening against 80 recombinant human kinases.

| Kinase  | Tm shift (°C) |            |        | Kinase   | Tm shift (°C) |            |        |
|---------|---------------|------------|--------|----------|---------------|------------|--------|
|         | Dorsomorphin  | LDN-193189 | K02288 |          | Dorsomorphin  | LDN-193189 | K02288 |
| AAK1    | 3.8           |            | 0.5    | JNK1     | 0.0           | 0.5        | 0.2    |
| ActRIIA | 6.1           | 8.6        | 8.3    | JNK2     | 0.4           | -0.6       | -0.1   |
| AKT3    | 0.5           |            | 0.5    | LOK      | 2.5           | 3.1        | 2.1    |
| ALK1    | 10.6          | 15.7       | 14.2   | MEK2     | -0.1          | 2.1        | 2.4    |
| ALK2    | 10.3          | 14.3       | 13.1   | MEK6     | 0.1           |            | 1.9    |
| ALK3    |               | 14.0       | 12.8   | MPSK1    | 5.3           | 5.3        | 0.3    |
| ALK4    | 6.1           | 11.0       | 8.2    | MRCKβ    | 0.0           | 0.6        | 0.4    |
| ALK5    | 7.4           | 12.0       | 11.6   | MST3     | 4.6           | 7.9        | 0.3    |
| ALK6    | 12.4          | 17.1       | 13.9   | MST4     | 0.7           | 0.8        | 0.2    |
| AMPKα1  | 3.9           | 4.3        | 0.2    | MYLK4    | 4.3           |            | 1      |
| AMPKα2  | 7.1           | 8.3        | 1.2    | NDR1     | 2.8           |            | 0.1    |
| BMPRII  | 1.5           | -0.4       | 3.5    | NEK1     | 0.1           | 0.2        | 0.2    |
| BMX     | 1.4           |            | 1.0    | NEK11    | 2             | -0.3       | 0.3    |
| BRK     | 2.8           |            | 0.0    | OSR1     | 1.6           | 0.9        | 0.0    |
| CAMK1δ  | -0.3          |            | -0.3   | p38β     | 1.1           |            | 0.5    |
| CDK2    | 2.5           | 0.7        | 0.1    | p38δ     | 0.0           | -0.4       | -0.2   |
| CDK8    | 0.5           |            | 0.1    | PCTAIRE1 | 4.7           |            | -1.8   |
| CDKL1   | 2.0           |            | 0.0    | PIM1     | 0.6           | 0.5        | 0.1    |
| CHEK2   | 1.7           | 1.4        | 0.0    | PIM2     | 0.6           | -1.3       | 0.1    |
| CK1γ1   | 0.4           | 0.3        | 0.7    | PIM3     | 0.6           | -0.2       | -0.2   |
| CK1γ3   | 1.2           |            | 2.0    | PKCη     | 0.9           |            | 1.2    |
| CK1ε    | 5.9           |            | 4.5    | PKD2     | 0.1           |            | 0.2    |
| CK2α1   | 3.8           |            | 0.3    | PKD3     | 0.9           |            | 1.2    |
| CLK1    | 8.3           |            | -0.1   | PKMYT1   | 0.1           |            | -0.4   |
| CLK2    | 5.0           | 3.3        | 0.0    | PKN1     | 2.3           | 2.3        | 0.5    |
| CLK3    | 3.7           | 0.7        | 0.0    | PLK4     | 4.2           | 3.7        | 0.0    |
| CLK4    | 8.7           | 5.3        | 0.3    | PRKX     | 2.9           |            | 0.2    |
| DAPK3   | 1.2           |            | 0.2    | PTK7     | -1.2          | -0.3       | -1.3   |
| DCAMKL1 | 0.3           |            | 0.1    | RSK1     | 2.8           | 3.3        | 1.1    |
| DRAK1   | 9.0           |            | 1.0    | RSK4     | 2.7           |            | 1.4    |
| DRAK2   | 10.0          | 2.1        | 0.6    | SLK      | 1.6           | 1.2        | 1.0    |
| DYRK1A  | 4.4           |            | -0.9   | SRPK2    | 0.2           |            | 0.2    |
| DYRK2   | 5.1           |            | 0.3    | STK33    | 4.2           | 6.5        | 1.1    |
| ERK1    | 0.0           | 0.2        | 0.2    | TNIK     | 4.2           | 4.6        | 6.1    |
| FES     | 0.5           | 0.4        | 0.4    | TOPK     | 0.3           |            | -0.2   |
| GAK     | 4.3           |            | 6.9    | TTK      | 1.0           |            | 1.1    |
| GRK1    | 0.4           | -0.7       | 0.0    | VRK1     | 0.4           |            | 0.5    |
| GRK3    | -0.1          |            | 0.1    | VRK2     | 0.2           | -0.2       | 0.6    |
| GUCY2D  | -0.1          | -0.2       |        | YANK1    | 0.5           | 1.2        | 0.2    |
| Haspin  | 2.3           | 0.4        | 0.3    | ZAK      | 0.5           | 2.7        | -0.1   |
