# Supplementary material for: A New Class of Small Molecule Inhibitor of BMP Signaling
Source: PubMed Central journal article supplement (PMC3639963; doi:10.1371/journal.pone.0062721), 2013-04-30
Supplement: pone.0062721.s003.pdf [file pone.0062721.s003.pdf]

Table S2. Kinome-wide selectivity profiling performed by Nanosyn ([www.nanosyn.com](http://www.nanosyn.com)).

| Kinase     | Compound    |     |                 |     | Kinase  | Compound    |     |                 |     | Kinase   | Compound    |     |                 |     | Kinase | Compound    |     |                 |     |
|------------|-------------|-----|-----------------|-----|---------|-------------|-----|-----------------|-----|----------|-------------|-----|-----------------|-----|--------|-------------|-----|-----------------|-----|
|            | K02288 (μM) |     | LDN-193189 (μM) |     |         | K02288 (μM) |     | LDN-193189 (μM) |     |          | K02288 (μM) |     | LDN-193189 (μM) |     |        | K02288 (μM) |     | LDN-193189 (μM) |     |
|            | 0.1         | 1   | 0.1             | 1   |         | 0.1         | 1   | 0.1             | 1   |          | 0.1         | 1   | 0.1             | 1   |        | 0.1         | 1   | 0.1             | 1   |
| ABL1       | 79          | 89  | 62              | 84  | CSK     | 3.2         | 13  | 3.3             | 6   | NEK2     | -2          | -2  | 2.8             | 1.2 | PRKG1  | 0.3         | 3.3 | 1               | 1.2 |
| AKT1       | -2          | -1  | 0.8             | 1.6 | DAPK1   | -1          | -1  | 1.5             | 0.4 | IRR      | -1          | -1  | 1.9             | 2.2 | PRKG2  | 1           | 5   | 1.7             | 9.3 |
| AKT2       | -2          | -1  | 1               | 1.8 | DCAMKL2 | -2          | 2.3 | 0.8             | 3.4 | ITK      | -0          | -0  | 0.9             | 3.6 | PRKX   | -1          | -1  | 0.2             | 1.2 |
| AKT3       | -2          | 1.2 | 0.2             | 1.5 | DDR2    | -0          | 11  | 5.5             | 27  | JAK1     | -0          | 0.4 | 2.7             | 4.2 | PTK5   | 2.2         | 22  | 4.1             | 14  |
| ALK        | -1          | 2.5 | 3.7             | 12  | DYRK1A  | 1.9         | 4.1 | 10              | 53  | JAK2     | -0          | -0  | 2               | 0.5 | PYK2   | -1          | 0   | 4.6             | 9   |
| AMPKα1     | -1          | -0  | 5.2             | 23  | DYRK1B  | 2.6         | 6   | 7.1             | 41  | JAK3     | 5.6         | 2.3 | -0              | 0.1 | RET    | 2.1         | 3.9 | 4               | 16  |
| ARG        | 66          | 85  | 33              | 73  | DYRK2   | -1          | -3  | 2.3             | 0.2 | JNK2     | 0.9         | -0  | 3.9             | 1.3 | ROCK1  | 0.5         | 3.1 | 0               | 0.7 |
| ARK5       | 1.1         | 4.1 | 16              | 56  | EGFR    | 2.4         | 12  | 1.5             | 4.8 | KDR      | 0.5         | 3.9 | 19              | 69  | ROCK2  | -1          | 0.8 | 1.4             | 1.5 |
| AURKA      | -2          | -1  | 4.2             | 23  | EPHA2   | -2          | 3   | -2              | -3  | KIT      | 4           | 9.2 | 7               | 41  | RON    | 3           | -1  | -2              | 12  |
| AURKB      | 0.3         | 1.5 | 2.3             | 15  | EPHA3   | -6          | 4.3 | 2.2             | 6.3 | LCK      | 13          | 58  | 12              | 46  | ROS    | 1.8         | 6.8 | 3.8             | 3.7 |
| AURKC      | -1          | 3.2 | 4.2             | 25  | EPHA4   | -2          | 17  | 7.1             | 10  | LOK      | 3.5         | 25  | 8.3             | 38  | RSK1   | 0.8         | 1.8 | 0.6             | 8   |
| AXL        | 0.9         | 1.5 | -4              | 1.1 | EPHB2   | -0          | 21  | 8.4             | 24  | LRRK2    | 7.1         | 27  | 8.7             | 27  | RSK2   | 0.8         | 2.2 | 1.2             | 5.4 |
| BLK        | 3.2         | 27  | 3.9             | 24  | EPHB3   | -2          | -1  | 5.6             | 4.3 | LTK      | 3.6         | 31  | 3.6             | 4   | RSK3   | 0.6         | 1.1 | 1.5             | 5.6 |
| BMX        | 0.5         | 19  | 0.2             | 4   | EPHB4   | -0          | 5.9 | -1              | 6.6 | LYNA     | 9.7         | 49  | 9.1             | 39  | RSK4   | 0.1         | 1   | 0.8             | 3.8 |
| BRAF       | -0          | 12  | 3.5             | 5.2 | ERBB2   | -5          | -3  | 2.1             | 2.1 | LYNB     | 6           | 43  | 7.4             | 34  | SGK1   | 1.1         | -2  | 1.1             | 0.8 |
| BRK        | 13          | 66  | 13              | 57  | ERBB4   | -5          | 0.9 | 6.1             | 11  | MAP4K2   | 18          | 53  | 21              | 65  | SGK2   | 2.7         | 1.3 | 2.3             | 0.2 |
| BRSK1      | 2.3         | -0  | 3               | 17  | FER     | 0.8         | 7.5 | 2.8             | 3.7 | MAP4K4   | 46          | 89  | 31              | 81  | SGK3   | -2          | -1  | 1.6             | 2.3 |
| BRSK2      | 0.9         | 2.7 | 4.4             | 22  | FES     | -1          | -1  | 2.2             | 2.4 | MAPK1    | -3          | 9.9 | 2.6             | 1.4 | SIK    | 9.4         | 57  | 63              | 96  |
| BTK        | 0.5         | 6.6 | 0.5             | 1.8 | FGFR1   | -1          | -3  | 3.4             | 19  | MAPK3    | -0          | -1  | 1.9             | -2  | SPHK1  | -4          | -1  | -11             |     |
| CAMK1δ     | -2          | -1  | 0.8             | 0.9 | FGFR2   | 0.3         | 1.1 | 5               | 18  | MAPKAPK2 | -2          | -1  | 0.7             | -0  | SPHK2  | -2          | 4.4 | -1              | -3  |
| CAMK2α     | -2          | -2  | -0              | -8  | FGFR3   | -2          | 0.2 | 5               | 16  | MAPKAPK3 | -1          | -2  | 1.6             | 0.5 | SRC    | 5.1         | 40  | 8               | 33  |
| CAMK2δ     | -1          | 1.4 | 3.1             | 8.7 | FGFR4   | 4           | -0  | 0.3             | 2.4 | MARK1    | 1.3         | 4.5 | 13              | 62  | SRMS   | 0.8         | 17  | -1              | 8.9 |
| CAMK4      | -1          | -1  | 0.1             | -0  | FGR     | 6.7         | 37  | 13              | 53  | MARK3    | 2.6         | 5.6 | 11              | 63  | SRPK1  | 3.2         | 2.7 | -1              | -2  |
| CDK1/cycB  | 1           | 1.5 | 0.5             | 5   | FLT1    | 0           | -2  | 0               | 17  | MARK4    | 2.4         | 7.2 | 13              | 61  | SYK    | -0          | -2  | -1              | -12 |
| CDK2/cycA  | -0          | -0  | 1.2             | 4.1 | FLT3    | -2          | 0.4 | 3.4             | 12  | MEK1     | -1          | 10  | 1.4             | 1   | TBK1   | 1.5         | 3.7 | 4.5             | 16  |
| CDK2/cycE  | 0.2         | 1.5 | 2.8             | 5.3 | FLT4    | 0.6         | 1.4 | 3.4             | 13  | MER      | 5.1         | 40  | 4.4             | 10  | TEC    | 0.3         | 14  | 1.8             | 5.5 |
| CDK3/cycE  | 1.6         | -91 | 1.6             | 7   | FMS     | 6.1         | 33  | 3.7             | 26  | MET      | 0.6         | -2  | 6.2             | 8.4 | TIE2   | 1           | 3   | 2               | 16  |
| CDK4/cycD  | 0.1         | 1.3 | 0.8             | 8.3 | FYN     | 10          | 43  | 18              | 60  | MINK     | 36          | 86  | 26              | 71  | TNK1   | 0.4         | 10  | 18              | 63  |
| CDK5/p35   | 0.3         | 1.9 | 1.4             | 8.5 | GRK6    | 0.2         | 1.4 | -0              | 0.2 | MKNK1    | 0.7         | 1.3 | 7.1             | 37  | TNK2   | 3.6         | 31  | 2               | 10  |
| CDK6/cycD3 | 1.7         | 2.8 | 7.2             | 22  | GRK7    | 0.2         | -3  | 1.8             | 0.8 | MNK2     | 1.9         | 3.2 | 3.7             | 31  | TRKA   | 1.5         | 2.8 | 1.9             | 7.2 |
| CHEK1      | -1          | -2  | 2.9             | 0.3 | GSK3α   | 0.6         | 2.1 | 3.2             | 1.1 | MRCKα    | 2           | 6.9 | 0.8             | 6.8 | TRKB   | 1.8         | 3.9 | 0.8             | 3   |
| CHEK2      | -1          | 2.5 | 1.5             | 2   | GSK3β   | 0.5         | 1.6 | 2.7             | 2.1 | MRCKβ    | 0.6         | 2   | -0              | 2.1 | TRKC   | 2.7         | 2.4 | 1.6             | 3.9 |
| CK1α       | -0          | 7.2 | 14              | 56  | HCK     | 8.9         | 51  | 9.7             | 33  | MSK1     | -2          | -1  | 1.1             | 1.3 | TSSK1  | -1          | -2  | 3.5             | 5.2 |
| CK1γ1      | -0          | 6.1 | 3.1             | 14  | HIPK1   | 1.7         | 3.1 | 0.6             | 4.4 | MSK2     | -1          | 1   | 0.9             | 0.8 | TSSK2  | -1          | -3  | 0               | 0.5 |
| CK1γ2      | -1          | 5.5 | 1.6             | 3.9 | HIPK4   | 0.8         | 4.2 | -0              | 4.9 | MSSK1    | 1.8         | -0  | -3              | 1.5 | TTK    | -4          | -1  | 4.5             | 7.6 |
| CK1γ3      | 2.7         | 19  | 2.3             | 5.5 | IGF1R   | -3          | -1  | 4.1             | 5.4 | MST1     | -1          | 1.1 | 4               | 7.9 | TXK    | 2.8         | 36  | 4.1             | 16  |
| CK2        | 6.2         | 2.8 | 0.7             | 4.2 | IKK-α   | 7.4         | 2.7 | 3               | -2  | MST2     | -2          | -1  | 5.1             | 6   | TYK2   | -0          | 1.8 | -1              | -2  |
| CLK2       | -0          | 0   | 2.3             | 35  | IKK-β   | -2          | 1.3 | 0.3             | 1.4 | MST4     | 0.4         | 0   | -1              | -5  | TYRO3  | 1.8         | 19  | 13              | 58  |
| CLK3       | 1.4         | 1.5 | 0.5             | 2.6 | IKK-ε   | -6          | -2  | 7.5             | 7.4 | MUSK     | 1.2         | -1  | 5.8             | 26  | YES    | 4.9         | 34  | 12              | 50  |
| cRAF       | -5          | -8  | 0.6             | 0.1 | INSR    | -4          | 0.7 | 3.8             | 4.5 | NEK1     | -1          | 0.8 | 2.1             | 3.4 | ZAP70  | -2          | 1   | 4.7             | 1   |
